# Supplementary material for: Measurement properties of quality of life measurement instruments for infants, children and adolescents with eczema: protocol for a systematic review
Source: Springer Nature journal article supplement (doi:10.1186/s13643-016-0202-z), 2016-02-09
Supplement: MOESM1 [file 9787734]

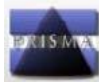

# PRISMA-P 2015 Checklist

| Section/topic                     | #  | Checklist item                                                                                                                                                                                                            | Reported on page(s) # |
|-----------------------------------|----|---------------------------------------------------------------------------------------------------------------------------------------------------------------------------------------------------------------------------|-----------------------|
| <b>ADMINISTRATIVE INFORMATION</b> |    |                                                                                                                                                                                                                           |                       |
| <b>Title</b>                      |    |                                                                                                                                                                                                                           |                       |
| Identification                    | 1a | Identify the report as a protocol of a systematic review                                                                                                                                                                  | 1                     |
| Update                            | 1b | If the protocol is for an update of a previous systematic review, identify as such                                                                                                                                        | N/A                   |
| <b>Registration</b>               |    |                                                                                                                                                                                                                           |                       |
| Registration                      | 2  | If registered, provide the name of the registry (e.g., PROSPERO) and registration number                                                                                                                                  | 3; 6                  |
| <b>Authors</b>                    |    |                                                                                                                                                                                                                           |                       |
| Contact                           | 3a | Provide name, institutional affiliation, and e-mail address of all protocol authors; provide physical mailing address of corresponding author                                                                             | 1                     |
| Contribution                      | 3b | Describe contributions of protocol authors and identify the guarantor of the review                                                                                                                                       | 14-15                 |
| <b>Amendments</b>                 |    |                                                                                                                                                                                                                           |                       |
| Amendments                        | 4  | If the protocol represents an amendment of a previously completed or published protocol, identify as such and list changes; otherwise, state plan for documenting important protocol amendments                           | 4-5; 11-12            |
| <b>Support</b>                    |    |                                                                                                                                                                                                                           |                       |
| Sources                           | 5a | Indicate sources of financial or other support for the review                                                                                                                                                             | 15                    |
| Sponsor                           | 5b | Provide name for the review funder and/or sponsor                                                                                                                                                                         | N/A                   |
| Role of sponsor/funder            | 5c | Describe roles of funder(s), sponsor(s), and/or institution(s), if any, in developing the protocol                                                                                                                        | N/A                   |
| <b>INTRODUCTION</b>               |    |                                                                                                                                                                                                                           |                       |
| Rationale                         | 6  | Describe the rationale for the review in the context of what is already known                                                                                                                                             | 4-5                   |
| Objectives                        | 7  | Provide an explicit statement of the question(s) the review will address with reference to participants, interventions, comparators, and outcomes (PICO)                                                                  | 5                     |
| <b>METHODS</b>                    |    |                                                                                                                                                                                                                           |                       |
| Eligibility criteria              | 8  | Specify the study characteristics (e.g., PICO, study design, setting, time frame) and report characteristics (e.g., years considered, language, publication status) to be used as criteria for eligibility for the review | 6-7                   |
| Information sources               | 9  | Describe all intended information sources (e.g., electronic databases, contact with study authors, trial registers, or other grey literature sources) with planned dates of coverage                                      | 6                     |
| Search strategy                   | 10 | Present draft of search strategy to be used for at least one electronic database, including planned limits, such that it could be repeated                                                                                | 6; additional file    |

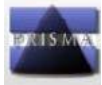

# PRISMA-P 2015 Checklist

| Section/topic                      | #   | Checklist item                                                                                                                                                                                                                              | Reported on page(s) # |
|------------------------------------|-----|---------------------------------------------------------------------------------------------------------------------------------------------------------------------------------------------------------------------------------------------|-----------------------|
| <b>Study records</b>               |     |                                                                                                                                                                                                                                             |                       |
| Data management                    | 11a | Describe the mechanism(s) that will be used to manage records and data throughout the review                                                                                                                                                | 7-8                   |
| Selection process                  | 11b | State the process that will be used for selecting studies (e.g., two independent reviewers) through each phase of the review (i.e., screening, eligibility, and inclusion in meta-analysis)                                                 | 7                     |
| Data collection process            | 11c | Describe planned method of extracting data from reports (e.g., piloting forms, done independently, in duplicate), any processes for obtaining and confirming data from investigators                                                        | 7-8                   |
| <b>METHODS</b>                     |     |                                                                                                                                                                                                                                             |                       |
| Data items                         | 12  | List and define all variables for which data will be sought (e.g., PICO items, funding sources), any pre-planned data assumptions and simplifications                                                                                       | 8-9                   |
| Outcomes and prioritization        | 13  | List and define all outcomes for which data will be sought, including prioritization of main and additional outcomes, with rationale                                                                                                        | 5; 8-9                |
| Risk of bias in individual studies | 14  | Describe anticipated methods for assessing risk of bias of individual studies, including whether this will be done at the outcome or study level, or both; state how this information will be used in data synthesis                        | 8                     |
| <b>Data</b>                        |     |                                                                                                                                                                                                                                             |                       |
| Synthesis                          | 15a | Describe anticipated methods for assessing risk of bias of individual studies, including whether this will be done at the outcome or study level, or both; state how this information will be used in data synthesis                        | N/A                   |
|                                    | 15b | If data are appropriate for quantitative synthesis, describe planned summary measures, methods of handling data, and methods of combining data from studies, including any planned exploration of consistency (e.g., $I^2$ , Kendall's tau) | N/A                   |
|                                    | 15c | Describe any proposed additional analyses (e.g., sensitivity or subgroup analyses, meta-regression)                                                                                                                                         | N/A                   |
|                                    | 15d | If quantitative synthesis is not appropriate, describe the type of summary planned                                                                                                                                                          | 10                    |
| <b>METHODS</b>                     |     |                                                                                                                                                                                                                                             |                       |
| Meta-bias(es)                      | 16  | Specify any planned assessment of meta-bias(es) (e.g., publication bias across studies, selective reporting within studies)                                                                                                                 | N/A                   |
| Confidence in cumulative evidence  | 17  | Describe how the strength of the body of evidence will be assessed (e.g., GRADE)                                                                                                                                                            | 10-11                 |

Abbreviations: N/A = not applicable.

From: Moher D, Shamseer L, Clarke M, Ghersi D, Liberati A, Petticrew M, Shekelle P, Stewart LA, PRISMA-P Group (2015). Preferred reporting items for systematic review and meta-analysis protocols (PRISMA-P) 2015 statement. Syst Rev 4:1. doi: 10.1186/2046-4053-4-1

For more information, visit: [www.prisma-statement.org](http://www.prisma-statement.org).
